# 1 Novel Domain V mutation in *cfr*-positive clinical *Staphylococcus haemolyticus* 2 isolates causing linezolid resistance in Egyptian ICU patients

3

4 Saber Maghraby<sup>1</sup>, Mohamed Ez El-Din Dawoud<sup>1</sup>, Mohamed Eweis<sup>1</sup>, Abdullah El-  
5 nagish<sup>2\*</sup>, Doaa Ghaith<sup>3</sup>

6 <sup>1</sup> Department of Botany and Microbiology, Faculty of Science, Cairo University,  
7 Cairo, Egypt

8 <sup>2</sup> Department of Botany and Microbiology, Faculty of Science, Sohag University,  
9 82524 Sohag, Egypt

10 <sup>3</sup> Clinical and Chemical Pathology Department, Faculty of Medicine, Cairo  
11 University, Cairo, Egypt

12 \*Corresponding author: [ael.nagish@science.sohag.edu.eg](mailto:ael.nagish@science.sohag.edu.eg)

## 13 Abstract

14 Linezolid resistance has become a focal point worldwide, particularly as  
15 linezolid stands as one of the last resort antibiotics against multiple-drug resistant  
16 bacterial strains. Despite its critical importance, the situation in Egypt remains  
17 relatively unexplored. As various linezolid resistance mechanisms have been  
18 identified in staphylococci, our investigation aims to uncover the molecular  
19 characteristics of staphylococci showing reduced susceptibility to Linezolid at Kasr-  
20 El-Eini Teaching Hospital. Thirty isolates were investigated in this study. The  
21 selected samples, identified by Vitek 2 system and confirmed by 16S rRNA, were  
22 examined by disc diffusion method. Of the 30 isolates, two were confirmed as  
23 linezolid resistant and screened for the presence of *cfr* gene and mutations in the

24 Domain V of the 23S rRNA gene. Both of the studied strains, identified as  
25 *Staphylococcus haemolyticus*, SZ-2 and SZ-7 harbored two point mutations G2576T  
26 and G2602T in the Domain V of the 23S rRNA gene. A novel G2694C mutation  
27 reported for the first time was detected in strain SZ-7. The presence of *cfr* gene was  
28 confirmed in both isolates. Linezolid-resistant *Staphylococcus haemolyticus* had  
29 emerged in ICU patients with prior antibiotic exposure. The exact role of the novel  
30 G2694C mutation in linezolid resistance needs further investigations. The study  
31 underscores the importance of proper surveillance of *cfr*-carrying strains in the  
32 healthcare settings in Egypt.

### 33 **Keywords**

34 Linezolid, Resistance, Domain V, 23S rRNA, Mutations, *Staphylococcus*  
35 *haemolyticus*

### 36 **Introduction**

37 *Staphylococcus haemolyticus*, a coagulase-negative staphylococci (CoNS),  
38 naturally resides in the human skin tissue microbiota with the potential to induce  
39 various illnesses, such as skin infections, bloodstream infections, and other several  
40 nosocomial infections [1]. In recent years, broad-spectrum antibacterials were widely  
41 used in clinical settings, that led to a persistent rise in drug resistance. The current  
42 surge in bacterial drug resistance is a cause for serious concern [2]. Linezolid, an  
43 oxazolidinone antibiotic, was approved for clinical use in 2000 [3]. This antibiotic is  
44 potent against multidrug-resistant Gram-positive bacteria, including methicillin-  
45 resistant *Staphylococcus aureus* (MRSA), vancomycin-resistant Enterococci (VRE),  
46 and *Streptococcus pneumoniae* [4]. Activity of linezolid results from binding to the  
47 23S rRNA in the 50S ribosomal subunit. Thus, it acts as an inhibitor of protein

48 synthesis by binding to the ribosomal peptidyl transferase center (PTC) affecting  
49 tRNA positioning and eventually stopping the growth of bacteria [5,6].

50 The prevalence of linezolid resistance is steadily on the rise due to the  
51 extensive utilization of this antibiotic. Numerous reports have documented cases of  
52 linezolid-resistant staphylococci. The most well-established mechanisms underlying  
53 the development of linezolid-resistant staphylococci involves a mutation in the 23S  
54 rRNA gene target and the acquisition of the chloramphenicol-florfenicol resistance  
55 (cfr) gene [7,8,9,10]. The 23S rRNA, a constituent of the bacterial ribosome 50S  
56 subunit, can undergo mutations during exposure to linezolid, rendering the drug  
57 ineffective and ultimately resulting in drug resistance. Additionally, gene mutation  
58 sites exhibit variability among different strains [10, 11]. Among Staphylococcus  
59 strains, G2576T gene mutation is the most prevalent [11,12,13,14]. cfr gene, first  
60 identified in plasmids of Staphylococcus isolates from German cows, encodes a  
61 methyltransferase capable of modifying 23S rRNA [15]. The cfr gene facilitates  
62 methylation at specific sites on the ribosomal large subunit, leading to resistance  
63 against linezolid [5,16].

64 At our Kasr-El-Eini Teaching Hospital, the escalating concern lies in  
65 staphylococcal isolates in the intensive care units, which exhibit an extraordinary  
66 predisposition to develop resistance to all available antibiotics including linezolid.  
67 Consequently, in pursuit of viable treatment alternatives, there is a pressing need to  
68 comprehend the resistance mechanism of such isolates. Henceforth, this study was  
69 undertaken to investigate the molecular characteristics of linezolid-resistant S.  
70 haemolyticus identified in clinical infections. A collection of linezolid-resistant CoNS  
71 (LRCoNS) from 30 patients were evaluated for mechanisms of linezolid resistance.

## 72 **Materials and Methods**

### 73 **Sample collection, identification and antimicrobial susceptibility testing of** 74 **bacterial isolates**

75 Over two years; from March 2020 to March 2022, a total of 30 clinical isolates  
76 of staphylococci showing reduced susceptibility to Linezolid were collected from  
77 Kasr El-Eini Teaching Hospital. Samples were isolated from different specimens,  
78 including pus and blood. Disc diffusion method was used to screen isolates for  
79 linezolid resistance. Linezolid concentration used was 30 µg. The antimicrobial discs  
80 were obtained from Oxoid Ltd (Basingstoke, Hampshire, England, UK) and processed  
81 according to the manufacturer's instructions.

82 The identification of isolates was performed using conventional techniques  
83 such as cultivation on mannitol salt agar [17] and deoxyribonuclease (DNase) agar  
84 [18]. The isolates were further identified using VITEK 2 system (bioMérieux, Marcy-  
85 l'Étoile, France) using the VITEK 2 GP Card according to the manufacturer's  
86 instructions. The antibiotic susceptibility test of isolates was performed on Mueller  
87 Hinton agar using the Kirby Bauer disc diffusion method [19] as per Clinical and  
88 Laboratory Standard Institute [20] guidelines using antibiotic Linezolid 30 µg.  
89 Subsequently, identification of the selected bacterial isolates was confirmed by 16S  
90 rRNA gene [21]. All the relevant clinical data were collected for analysis, including  
91 dose and length of linezolid treatments and other results of antimicrobial  
92 susceptibility tests.

### 93 **Mechanisms of linezolid resistance among the isolates**

94 The two most resistant *Staphylococcus haemolyticus* strains (namely SZ-2 and  
95 SZ-7) were selected and screened for point mutations in Domain V of the 23S rRNA

gene and the presence of the *cfr* gene by PCR and DNA sequencing as described previously [7,8,9,10].

The genomic DNA was isolated using Quick-DNA™ Miniprep Kit from Zymo Research™ according to the manufacturer instruction manual. Amplification was performed using the following PCR conditions: 35 cycles of denaturing, annealing, and extension at 94°C (30 s), 55°C (30 s), and 72°C (1 min) respectively; and a final 10-min extension at 72°C.

To elucidate the mechanism of linezolid resistance, screening for *cfr* gene and point mutations in domain V of 23S rRNA gene were investigated by amplifying the loci using the PCR conditions described by Yoo et al [8]. Amplification by PCR was performed using primers listed in Table 1. Amplicons were sequenced on both strands and sequences were aligned with the corresponding sequences from linezolid-susceptible *S. haemolyticus* JCSC 1435 (GenBank accession No. AP006716). All sequenced data was uploaded to the NCBI under accession numbers shown in the data availability section.

**Table 1.** Primers are used for PCR amplification of targeted genes.

| Target genes             | Primer name    | Sequence (5′-3′)                 | Product size (bp) | Reference |
|--------------------------|----------------|----------------------------------|-------------------|-----------|
| Domain V of the 23S rRNA | 23S_rRNA_Fw    | 5′-GCGGTCGCCTCCTAAAAG-3′         | 390               | [22]      |
|                          | 23S_rRNA_Rv    | 5′-ATCCCGGTCCTCTCGTACTA-3′       |                   |           |
| <i>cfr</i> gene          | <i>cfr</i> -Fw | 5′-TGAAGTATAAAGCAGGTTGGGAGTCA-3′ | 746               | [23]      |
|                          | <i>cfr</i> -Rv | 5′-ACCATATAATTGACCACAAGCAGC-3′   |                   |           |

112

## 113 **Results and Discussion**

114 Twenty four of the total 30 isolates were found to be totally susceptible to  
115 linezolid. Isolates SZ-2 and SZ-7, showed the highest resistance to linezolid, were  
116 selected for further investigations. The two isolates were identified as *Staphylococcus*  
117 based on their characteristic growth on blood agar and microscopic observations. The  
118 isolates were negative for mannitol fermentation, DNase and coagulase test, thus  
119 confirming coagulase negative *Staphylococcus*. The Vitek 2 system identified the  
120 isolates correctly (Table 2), with a probability of 99% and confidence level  
121 'excellent'. The 16S rRNA gene sequence revealed that the isolates are *S.*  
122 *haemolyticus* with 99% similarity with *S. haemolyticus* strain JCSC1435 in BLAST  
123 search.

124 Strain SZ-2, with a linezolid inhibition zone diameter (IZD) less than 1 mm  
125 (zone diameter breakpoint according to CLSI 2023  $\leq 20$  mm), was found to have  
126 G2576T and G2602T mutations in the Domain V of 23S rRNA gene (Table 2). A  
127 novel G2694C mutation in addition to the same two G2576T and G2602T mutations,  
128 both in domain V of the 23S rRNA gene, were identified in *S. haemolyticus* strain SZ-  
129 7 with a linezolid IZD less than 1 mm.

130 Previous studies have already reported the G2576T and G2602T substitutions  
131 in the Domain V of the 23S rRNA gene of linezolid-resistant *Staphylococcus spp.*  
132 [2,7,12,13,14,24]. Although both mutations were first reported in 2007 and in 2021,  
133 respectively [2,25], this is the first report of these mutations in *S. haemolyticus*  
134 isolated in Egypt. The novel mutation G2694C, whether it plays a role in linezolid  
135 resistance is uncertain and needs further confirmation. Nevertheless, this revelation

may have the potential to contribute valuable insights into investigating the mechanism of linezolid resistance caused by mutations in the V domain of 23S rRNA gene.

*cfr* gene in both isolates was detected and confirmed by sequencing the amplicons on both strands. At Kasr-El-Eini Teaching Hospital, isolations of a *cfr*-carrying clinical *S. haemolyticus* isolates from the ICU units is extremely alerting to us. Our greatest concern is the presence of the *cfr* gene in both isolates, as its minimal fitness cost allows cells to retain it even in the absence of selection pressure from the antibiotic. Typically, the *cfr* gene is situated in an unstable genetic environment, either on the chromosome or on multidrug-resistant plasmids [26]. This precarious positioning would facilitate the easy spread of *cfr* into susceptible populations and other pathogenic bacteria. Moreover, *cfr*-mediated resistance confers resistance to a wide-spectrum of antibiotics not only linezolid and thus poses a significant challenge to therapeutic options.

Table (2): Mutations detected in the V domain of 23S rRNA gene of the resistant isolates *S. haemolyticus* strain SZ-2 and SZ-7.

| Strain | ICU | Clinical sample | Vitek 2 results |     | Coagulase test | Mutations of the Domain V of 23S rRNA gene | MIC (µg/mm) Linezolid | Linezolid IZD (CLSI 2023) | cfr gene |
|--------|-----|-----------------|-----------------|-----|----------------|--------------------------------------------|-----------------------|---------------------------|----------|
|        |     |                 | P (%)           | C.L |                |                                            |                       |                           |          |
| SZ-2   | Yes | Blood           | 99              | E   | Negative       | G2576T, G2602T                             | 30 µg                 | < 1 mm                    | +        |
| SZ-7   | Yes | Blood           | 99              | E   | Negative       | G2576T, G2602T,                            | 30 µg                 | < 1 mm                    | +        |

|  |  |  |  |  |  |        |  |  |  |
|--|--|--|--|--|--|--------|--|--|--|
|  |  |  |  |  |  | G2694C |  |  |  |
|--|--|--|--|--|--|--------|--|--|--|

152 P = Probability, C.L = Confidence Level, E = Excellent, IZD = Inhibition zone  
 153 diameter; Mutations in 23S rRNA according to *Staphylococcus* numbering  
 154 (NR\_076257.1)

155 Although linezolid resistance due to mutations in Domain V of the 23S rRNA  
 156 and presence of cfr gene were reported in several staphylococcal species from many  
 157 countries around the world such as Spain [27], the USA [28], Brazil [29], Mexico [30],  
 158 Japan [31] and Korea [32], this is the first report of these mutations in *S.*  
 159 *haemolyticus* isolated in Egypt. This first emergence of LRS in intensive care units  
 160 in our hospital during a short period is very worrying, requiring serious measures and  
 161 proper surveillance in the healthcare settings to prevent the intrahospital  
 162 dissemination of resistant strains. The novel G2694C mutation in Domain V of the  
 163 23S rRNA, whether it plays a role in linezolid resistance is uncertain and needs  
 164 further confirmation. Nevertheless, this revelation may have the potential to  
 165 contribute valuable insights into investigating the mechanism of linezolid resistance  
 166 caused by mutations in Domain V of the 23S rRNA. The study emphasizes the need  
 167 for proper surveillance of cfr-carrying strains in the healthcare settings in Egypt.

#### 168 **Data availability**

169 All sequenced data was uploaded to the NCBI under accession numbers PP525131-  
 170 PP525132 for *cfr* genes and PP506638- PP506639 for 23S ribosomal RNA gene of *S.*  
 171 *haemolyticus* strain SZ-2 and SZ-7 respectively.

#### 172 **Acknowledgements**

173 Not applicable.

#### 174 **Ethical approval**



175 Ethical approval was granted by the Review Board of the Clinical and Chemical  
176 Pathology Department, Faculty of Medicine, Cairo University, Egypt prior to the  
177 beginning of the study with a waiver of informed consents.

## 178 **Disclosure statement**

179 The authors declare that there are no conflicts of interest.

## 180 **Funding**

181 Not applicable.

## 182 **ORCID**

183 Abdullah El-nagish: <https://orcid.org/0000-0002-5704-5475>

## 184 **References**

- 185 [1] Czekaj, T., Ciszewski, M., & Szewczyk, E. M. (2015). *Staphylococcus*  
186 *haemolyticus* – An emerging threat in the twilight of the antibiotics age.  
187 *Microbiol. (United Kingdom, 161, 2061–2068.*
- 188 [2] Gostev, V., Leyn, S., Kruglov, A., Likholetova, D., Kalinogorskaya, O., Baykina,  
189 M., & Sidorenko, S. (2021). Global expansion of linezolid-resistant coagulase-  
190 negative staphylococci. *Frontiers in Microbiology, 12, 661798.*
- 191 [3] Kehrenberg, C., Schwarz, S., Jacobsen, L., Hansen, L. H., & Vester, B. (2005). A  
192 new mechanism for chloramphenicol, florfenicol and clindamycin resistance:  
193 Methylation of 23S ribosomal RNA at A2503. *Molecular microbiology, 57(4),*  
194 *1064–1073.*
- 195 [4] Giessing, A. M. (2009). Identification of 8-methyladenosine as the modification  
196 catalyzed by the radical SAM methyltransferase Cfr that confers antibiotic  
197 resistance in bacteria. *RNA, 15, 327–336.*

- 198 [5] Long, K. S., & Vester, B. (2012). Resistance to linezolid caused by modifications  
199 at its binding site on the ribosome. *Antimicrobial Agents and Chemotherapy*,  
200 56(2), 603–612.
- 201 [6] Sadowy, E. (2018). *Linezolid resistance genes and genetic elements enhancing*  
202 *their dissemination in enterococci and streptococci*. Plasmid.
- 203 [7] Zhou, W., Niu, D., Gao, S., Zhong, Q., Liu, C., Liao, X., & Shen, H. (2023).  
204 Prevalence, biofilm formation, and mass spectrometric characterization of  
205 linezolid-resistant *Staphylococcus capitis* isolated from a tertiary hospital in  
206 China. *Journal of Global Antimicrobial Resistance*, 33, 155–163.
- 207 [8] Yoo, I. Y., Kang, O. K., Shim, H. J., Huh, H. J., & Lee, N. Y. (2020). Linezolid  
208 resistance in methicillin-resistant *Staphylococcus aureus* in Korea: High rate  
209 of false resistance to linezolid by the VITEK 2 system. *Annals of Laboratory*  
210 *Medicine*, 40(1), 57–62.
- 211 [9] Han, X., Zou, G., Liu, J., Yang, C., Du, X., Chen, G., & Jiang, X. (2022).  
212 Mechanisms of linezolid resistance in *Staphylococcus capitis* with the novel  
213 mutation C2128T in the 23S rRNA gene in China. *BMC Microbiology*, 22(1),  
214 203.
- 215 [10] Maarouf, L., Omar, H., El-Nakeeb, M., & Abouelfetouh, A. (2021). Prevalence  
216 and mechanisms of linezolid resistance among staphylococcal clinical isolates  
217 from Egypt. *European Journal of Clinical Microbiology & Infectious*  
218 *Diseases*, 40, 815–823.
- 219 [11] Almeida, L. M., Lincopan, N., Araújo, M. R. E., & Mamizuka, E. M. (2012).  
220 Clonal dissemination of linezolid-resistant *Staphylococcus haemolyticus*  
221 exhibiting the G2576T mutation in the 23S rRNA gene in a tertiary care  
222 hospital in Brazil. *Antimicrobial Agents and Chemotherapy*, 56(5), 2792.

- 223 [12] Balandin, B., Lobo, B., Orden, B., Román, F., García, E., Martínez, R., ... &  
224 Galdos, P. (2016). Emergence of linezolid-resistant coagulase-negative  
225 staphylococci in an intensive care unit. *Infectious Diseases*, 48(5), 343-349.
- 226 [13] Hegstad, K., Longva, J. Å., Hide, R., Aasnæs, B., Lunde, T. M., & Simonsen, G.  
227 S. (2014). Cluster of linezolid-resistant *Enterococcus faecium* ST117 in  
228 Norwegian hospitals. *Scandinavian journal of infectious diseases*, 46(10),  
229 712-715.
- 230 [14] Mazzariol, A., Kocsis, E., Bragagnolo, L., Pellizzer, G., Rassu, M., & Cornaglia,  
231 G. (2012). Co-infection by two linezolid-resistant coagulase-negative  
232 staphylococci with two different resistance determinants. *Scandinavian*  
233 *journal of infectious diseases*, 44(12), 978-981.
- 234 [15] Toh, S.-M. (2007). Acquisition of a natural resistance gene renders a clinical  
235 strain of methicillin-resistant *Staphylococcus aureus* resistant to the synthetic  
236 antibiotic linezolid. *Mol. Microbiol*, 64, 1506–1514.
- 237 [16] LaMarre, J. M., Locke, J. B., Shaw, K. J., & Mankin, A. S. (2011). Low fitness  
238 cost of the multidrug resistance gene *cfr*. *Antimicrob. Agents Chemother*, 55,  
239 3714–3719.
- 240 [17] Kateete, D. P., Kimani, C. N., Katabazi, F. A., Okeng, A., Okee, M. S., &  
241 Nanteza, A. (2010). Identification of *Staphylococcus aureus*: DNase and  
242 Mannitol salt agar improve the efficiency of the tube coagulase test, *Ann.*  
243 *Clin. Microb. Antimicrob*, 9, 23.
- 244 [18] Boerlin, P., Kuhnert, P., Hussy, D., & Schaellibaum, M. (2003). Methods for  
245 identification of *Staphylococcus aureus* isolates in cases of bovine mastitis. *J*  
246 *Clin Microbiol*, 41, 767–771.
- 247 [19] Hudzicki, J. (2009). Kirby-Bauer disk diffusion susceptibility test protocol.

- 248 *American society for microbiology*, 15, 55–63.
- 249 [20] CLSI, M. (2023). *Performance Standards for Antimicrobial Susceptibility*
- 250 *Testing* (33rd ed.).
- 251 [21] White, T. J., Bruns, T., Lee, S. J. W. T., & Taylor, J. (1990). Amplification and
- 252 direct sequencing of fungal ribosomal RNA genes for phylogenetics. *PCR*
- 253 *Protocols: A Guide to Methods and Applications*, 18, 315–322.
- 254 [22] Meka, V. G., Pillai, S. K., Sakoulas, G., Wennersten, C., Venkataraman, L., &
- 255 DeGirolami, P. C. (2004). Linezolid resistance in sequential *Staphylococcus*
- 256 *aureus* isolates associated with a T2500A mutation in the 23S rRNA gene and
- 257 loss of a single copy of rRNA. *J Infect Dis*, 190, 311–317.
- 258 [23] Lee, S. M., Huh, H. J., Song, D. J., Shim, H. J., Park, K. S., & Kang, C. I. (2017).
- 259 Resistance mechanisms of linezolid-nonsusceptible enterococci in Korea: Low
- 260 rate of 23S rRNA mutations in *Enterococcus faecium*. *J Med Microbiol*, 66,
- 261 1730–1735.
- 262 [24] Almeida, L. M., Araújo, M. R. E., Sacramento, A. G., Pavez, M., Souza, A. G.,
- 263 Rodrigues, F., & Mamizuka, E. M. (2013). Linezolid resistance in Brazilian
- 264 *Staphylococcus hominis* strains is associated with L3 and 23S rRNA
- 265 ribosomal mutations. *Antimicrobial Agents and Chemotherapy*, 57(8), 4082.
- 266 [25] Tarazona, R. E. R., Padilla, T. P., Gómez, J. C. S., Sánchez, J. E. G., &
- 267 Hernandez, M. S. (2007). First report in Spain of linezolid non-susceptibility
- 268 in a clinical isolate of *Staphylococcus haemolyticus*. *International Journal of*
- 269 *Antimicrobial Agents*, 3(30), 277–278.
- 270 [26] Gopegui, E. R., Juan, C., Zamorano, L., Perez, J. L., & Oliver, A. (2012).
- 271 Transferable multidrug resistance plasmid carrying cfr associated with tet(L),
- 272 ant (4')-Ia, and dfrK genes from a clinical methicillin resistant *Staphylococcus*

- 273 aureus ST125 strain. *Antimicrob Agents Chemother*, 56, 2139–2142.
- 274 [27] Morales Kucharski, M. G., Picazo, J. J., Baos, E., Candel, F. J., Arribi, A., Peláez
- 275 Ros, B., & Sánchez García, M. (2010). *Resistance to linezolid is mediated by*
- 276 *the cfr gene in the first report of an outbreak of linezolid-resistant*
- 277 *Staphylococcus aureus*.
- 278 [28] Bonilla, H., Huband, M. D., Seidel, J., Schmidt, H., Lescoe, M., McCurdy, S. P.,
- 279 & Quinn, J. P. (2010). Multicity outbreak of linezolid-resistant
- 280 Staphylococcus epidermidis associated with clonal spread of a cfr-containing
- 281 strain. *Clinical Infectious Diseases*, 51, 796–800.
- 282 [29] Gales, A. C., Sader, H. S., Andrade, S. S., Lutz, L., Machado, A., & Barth, A. L.
- 283 (2006). Emergence of linezolid-resistant Staphylococcus aureus during
- 284 treatment of pulmonary infection in a patient with cystic fibrosis. *International*
- 285 *Journal of Antimicrobial Agents*, 27, 300–302.
- 286 [30] Mendes, R. E., Deshpande, L., Rodriguez-Noriega, E., Ross, J. E., Jones, R. N.,
- 287 & Morfin-Otero, R. (2010). First report of staphylococcal clinical isolates in
- 288 Mexico with linezolid resistance caused by cfr: Evidence of in vivo cfr
- 289 mobilization. *Journal of Clinical Microbiology*, 48, 3041–3043.
- 290 [31] Ikeda-Dantsuji, Y., Hanaki, H., Sakai, F., Tomono, K., Takesue, Y., Honda, J.,
- 291 Nonomiya, Y., Suwabe, A., Nagura, O., & authors. (2011). Linezolid-resistant
- 292 Staphylococcus aureus isolated from 2006 through 2008 at six hospitals in
- 293 Japan. *J Infect Chemother*, 17, 45–51.
- 294 [32] An, D., Lee, M. Y., Jeong, T. D., Sung, H., Kim, M. N., & Hong, S. B. (2011).
- 295 Co-emergence of linezolid-resistant Staphylococcus aureus and Enterococcus
- 296 faecium in a patient with methicillin-resistant S. aureus pneumonic sepsis.
- 297 *Diagnostic Microbiology and Infectious Disease*, 69, 232–233.

It is made available under a [CC-BY 4.0 International license](#) .

298

299

300
